# Supplementary material for: Changes in Antidiabetic Drug Prescription and Glycemic Control Trends in Elderly Patients with Type 2 Diabetes Mellitus from 2005-2013: An Analysis of the National Center Diabetes Database (NCDD-03)
Source: PubMed Central journal article supplement — Intern Med. 2017 Dec 27;57(9):1229–40. doi: 10.2169/internalmedicine.9481-17 (PMC5980802; doi:10.2169/internalmedicine.9481-17), 2017-12-27
Supplement: 1349-7235-57-1229-s001.pdf [file 1349-7235-57-1229-s001.pdf]

Supplementary material. Sub-analysis in patients  $\geq 75$  years of age (as of the year 2013) stratified by years after diagnosis of diabetes.

| Years after diagnosis of diabetes                               | <15-years   | 15- to 20-years | $\geq 20$ -years |
|-----------------------------------------------------------------|-------------|-----------------|------------------|
| Number of patients                                              | 531 (42.2%) | 204 (17.0%)     | 523 (40.8%)      |
| Treatment category                                              |             |                 |                  |
| Category A                                                      | 14.7%       | 5.6%            | 6.0%             |
| Category B-1                                                    | 33.7%       | 21.0%           | 14.0%            |
| Category B-2                                                    | 35.8%       | 50.9%           | 41.0%            |
| Category C                                                      | 15.8%       | 22.4%           | 39.0%            |
| The percentages of patients with HbA1c values of less than 7.0% | 60.0%       | 53.3%           | 41.6%            |
| The percentages of patients with HbA1c values of less than 8.0% | 92.0%       | 83.5%           | 81.2%            |

Treatment category; category A, not prescribed any antidiabetic drugs; category B-1, prescribed antidiabetic drugs other than those potentially associated with severe hypoglycemia; category B-2, prescribed sulfonylureas or glinides; category C, prescribed insulin
